# Supplementary material for: Smart Clothing as a Noninvasive Method to Measure the Physiological Cardiac Parameters
Source: MDPI journal article supplement (doi:10.3390/healthcare9101318), 2021-10-02
Supplement: s1 [file s1]

## Supplementary information

Table S1 ANOVA for subject's independent variables versus heartbeat-difference

|            | Df | Sum Sq | Mean Sq | F value | Pr (>F) |
|------------|----|--------|---------|---------|---------|
| Gender     | 1  | 0.729  | 0.729   | 0.549   | 0.492   |
| Age        | 2  | 3.337  | 1.668   | 1.258   | 0.361   |
| Gender:Age | 1  | 2.51   | 2.51    | 1.892   | 0.227   |
| Residuals  | 5  | 6.633  | 1.327   |         |         |

※ Significant  $P < 0.05$ . No significant difference detected in this test

Table S2 Bayesian ANOVA for subject's independent variables

| Formula                       | Effect   | Error        |
|-------------------------------|----------|--------------|
| [1] Gender                    | 0.568588 | $\pm 0\%$    |
| [2] Age                       | 0.718174 | $\pm 0.01\%$ |
| [3] Gender + Age              | 0.386449 | $\pm 1.03\%$ |
| [4] Gender + Age + Gender:Age | 0.412438 | $\pm 2.11\%$ |

※ Significant effect  $> 1$ . No significant difference detected in this test

Table S3 The summary of the Student t-test for HB data

|                             | Paired differences |                       |                               |                                              |             |       | t | df    | Significance<br>(two-tailed) |
|-----------------------------|--------------------|-----------------------|-------------------------------|----------------------------------------------|-------------|-------|---|-------|------------------------------|
|                             | Mean               | Standard<br>deviation | Standard error of<br>the mean | 95% confidence interval of<br>the difference |             |       |   |       |                              |
|                             |                    |                       |                               | Lower limit                                  | Upper limit |       |   |       |                              |
| Pair clothbpm -<br>1 jelbpm | 0.01000            | 1.21147               | 0.38310                       | -0.85664                                     | 0.87664     | 0.026 | 9 | 0.980 |                              |

Table S4 R code for processing Bayesian t-test for HB data

```
> library(BayesFactor)
> HB <- read.table("HeartBeat.txt", header=TRUE)
> HB_ttestBF <- ttestBF(x=HB$Suite, y=HB$Gel, paired=TRUE, posterior=TRUE, iterations=1000)
```

Table S5 Output of testBF for HB data

```
Iterations = 1:1000
Thinning interval = 1
Number of chains = 1
Sample size per chain = 1000

1. Empirical mean and standard deviation for each variable,
   plus standard error of the mean:

      Mean      SD Naive SE Time-series SE
mu    -0.001977  0.3569  0.011285     0.010733
sig2   1.694825  1.0303  0.032580     0.036417
delta  0.001678  0.2772  0.008765     0.008765
g      14.591797 383.0622 12.113491    12.113491

2. Quantiles for each variable:
```

---

|       | 2.5%     | 25%     | 50%      | 75%    | 97.5%   |
|-------|----------|---------|----------|--------|---------|
| mu    | −0.70214 | −0.2178 | 0.009215 | 0.2168 | 0.6768  |
| sig2  | 0.67303  | 1.0774  | 1.435597 | 2.0004 | 4.2836  |
| delta | −0.53435 | −0.1800 | 0.006335 | 0.1839 | 0.5533  |
| g     | 0.07194  | 0.1972  | 0.408382 | 0.9824 | 13.2841 |
